# Supplementary material for: Solvent similarity index
Source: Royal Society of Chemistry journal article supplement (doi:10.1039/d0cp01570a), 2020-01-01
Supplement: d0cp01570a1.pdf [file d0cp01570a1.pdf]

## Solvent similarity index.

Mark Driver,<sup>a</sup> and Christopher A. Hunter<sup>\*a</sup>

<sup>a</sup> *Department of Chemistry, University of Cambridge, Lensfield Road, Cambridge CB2 1EW, UK. Tel: +44 (0)1223 336710; E-mail: herchelsmith.orgchem@ch.cam.ac.uk*

### Supplementary Information

|                                             |           |
|---------------------------------------------|-----------|
| <b>S1 SSIP domain normalisation factors</b> | <b>S1</b> |
| <b>S2 Pure solvent information</b>          | <b>S1</b> |
| <b>S3 Similarity regional dendrograms</b>   | <b>S6</b> |

#### S1 SSIP domain normalisation factors

| Domain                         | $\eta_j/\text{kJmol}^{-1}$ |
|--------------------------------|----------------------------|
| $-10.0 \leq \epsilon_i < -5.0$ | 29.574                     |
| $-5.0 \leq \epsilon_i < -2.0$  | 9.880                      |
| $-2.0 \leq \epsilon_i < 0.0$   | 2.111                      |
| $0.0 \leq \epsilon_i < 1.0$    | 2.069                      |
| $1.0 \leq \epsilon_i < 3.0$    | 11.245                     |
| $3.0 \leq \epsilon_i < 5.0$    | 30.556                     |

Table S1: Normalisation factors for SSIP domains.

#### S2 Pure solvent information

| Solvent                       | ID | InChIKey                     |
|-------------------------------|----|------------------------------|
| tetramethylsilane             | 1  | CZDYPVPMEAXLPK-UHFFFAOYSA-N  |
| n-pentane                     | 2  | OFBQJSOFQDEBGM-UHFFFAOYSA-N  |
| 2-methylbutane                | 3  | QWTDNUCVQCZILF-UHFFFAOYSA-N  |
| n-hexane                      | 4  | VLKZOEYOYAKHREP-UHFFFAOYSA-N |
| cyclohexane                   | 5  | XDTMQSROBMDMFD-UHFFFAOYSA-N  |
| n-heptane                     | 6  | IMNFDUFMRHMDMM-UHFFFAOYSA-N  |
| n-octane                      | 7  | TVMXDCGIABBOFY-UHFFFAOYSA-N  |
| 2,2,4-trimethylpentane        | 8  | NHTMVDHEPJAVLT-UHFFFAOYSA-N  |
| n-decane                      | 9  | DIOQQZVSQGTUSAI-UHFFFAOYSA-N |
| n-dodecane                    | 10 | SNRUBQQJIBEYMU-UHFFFAOYSA-N  |
| n-hexadecane                  | 11 | DCAYPVUWAIABOU-UHFFFAOYSA-N  |
| benzene                       | 12 | UHOVQNZJYSORNB-UHFFFAOYSA-N  |
| toluene                       | 13 | YXFVVABEGXRONW-UHFFFAOYSA-N  |
| ortho-xylene                  | 14 | CTQNGGLPUBDAKN-UHFFFAOYSA-N  |
| meta-xylene                   | 15 | IVSZLXZYQVIEFR-UHFFFAOYSA-N  |
| para-xylene                   | 16 | URLKBWYHVLBVBO-UHFFFAOYSA-N  |
| ethylbenzene                  | 17 | YNQLUTRBYVCPMQ-UHFFFAOYSA-N  |
| isopropylbenzene              | 18 | RWGFKTVRMDUZSP-UHFFFAOYSA-N  |
| 1,3,5-trimethylbenzene        | 19 | AUHZEENZYGFFBQ-UHFFFAOYSA-N  |
| styrene                       | 20 | PPBRXRYQALVLMV-UHFFFAOYSA-N  |
| 1,2,3,4-tetrahydronaphthalene | 21 | CXWXQJXEFPUDZ-UHFFFAOYSA-N   |
| cis-decalin                   | 22 | NNBZCPXTIHJB JL-AOOOYVTPSA-N |

Continued on next page

| Solvent                           | ID | InChIKey                     |
|-----------------------------------|----|------------------------------|
| water                             | 23 | XLYOFNOQVPJJNP-UHFFFAOYSA-N  |
| methanol                          | 24 | OKKJLVBELUTLKV-UHFFFAOYSA-N  |
| ethanol                           | 25 | LFQSCWFLJHTTHZ-UHFFFAOYSA-N  |
| 1-propanol                        | 26 | BDERNNFJNOPAEC-UHFFFAOYSA-N  |
| 2-propanol                        | 27 | KFZMGEQAYNKOFK-UHFFFAOYSA-N  |
| 1-butanol                         | 28 | LRHPLDYGVMQRHN-UHFFFAOYSA-N  |
| 2-methyl-1-propanol               | 29 | ZXEKIIBDNHEJCQ-UHFFFAOYSA-N  |
| 2-butanol                         | 30 | BTANRVKQWQNVYAZ-BYPYUZCNSA-N |
| 2-methyl-2-propanol               | 31 | DKGAVHZHDRPRBM-UHFFFAOYSA-N  |
| 1-pentanol                        | 32 | AMQJEAYHLZJPGS-UHFFFAOYSA-N  |
| 3-methyl-1-butanol                | 33 | PHTQWCKDNZKARW-UHFFFAOYSA-N  |
| 2-methyl-2-butanol                | 34 | MSXVEPNJUHWWHW-UHFFFAOYSA-N  |
| 1-hexanol                         | 35 | ZSIAUFGUXNUGDI-UHFFFAOYSA-N  |
| cyclohexanol                      | 36 | HPXRVTGHNJAIH-UHFFFAOYSA-N   |
| 1-octanol                         | 37 | KBPLFHGGFOOTCA-UHFFFAOYSA-N  |
| 1-decanol                         | 38 | MWKFXSUHUHTGQN-UHFFFAOYSA-N  |
| 1-dodecanol                       | 39 | LQZZUXJYWNFBMV-UHFFFAOYSA-N  |
| benzyl alcohol                    | 40 | WVDDGKGGOMKODPV-UHFFFAOYSA-N |
| 2-phenylethanol                   | 41 | WRMNZCZEMHIOC-UHFFFAOYSA-N   |
| allyl alcohol                     | 42 | XXROGKLTUQVRX-UHFFFAOYSA-N   |
| 2-chloroethanol                   | 43 | SZIFAVKTNFCBPC-UHFFFAOYSA-N  |
| 2-cyanoethanol                    | 44 | WSGYTJNNHPZFKR-UHFFFAOYSA-N  |
| 2,2,2-trifluoroethanol            | 45 | RHQDFWAXVIIEBN-UHFFFAOYSA-N  |
| 1,1,1,3,3,3-hexafluoro-2-propanol | 46 | BYEAHWXPCBROCE-UHFFFAOYSA-N  |
| 2-methoxyethanol                  | 47 | XNWFRZJHXBZDAG-UHFFFAOYSA-N  |
| 2-ethoxyethanol                   | 48 | ZNQVEEAIQZEUHB-UHFFFAOYSA-N  |
| ethylene glycol                   | 49 | LYCAIKOWRPUZTN-UHFFFAOYSA-N  |
| 1,2-propanediol                   | 50 | DNIAPMSPWPWGF-GSVOUGTGSA-N   |
| 1,3-propanediol                   | 51 | YFPDHNVEDLHUCE-UHFFFAOYSA-N  |
| 1,2-butanediol                    | 52 | BMRWNKZVCUKKSR-SCSAIBSYSA-N  |
| (2R,3S)-2,3-butanediol            | 53 | OWBTYPJTUOEWEK-ZXZARUISSA-N  |
| 1,4-butanediol                    | 54 | WERYXYBDKMZEQL-UHFFFAOYSA-N  |
| 1,5-pentanediol                   | 55 | ALQSHHUCVQOPAS-UHFFFAOYSA-N  |
| diethylene glycol                 | 56 | MTHSVFCYNBDYFN-UHFFFAOYSA-N  |
| triethylene glycol                | 57 | ZIBGPFATKBEMQZ-UHFFFAOYSA-N  |
| glycerol                          | 58 | PEDCQBHIVMGVHV-UHFFFAOYSA-N  |
| phenol                            | 59 | ISWSIDIOOJBQZ-UHFFFAOYSA-N   |
| ortho-cresol                      | 60 | QWVGKYWNOKOFNN-UHFFFAOYSA-N  |
| meta-cresol                       | 61 | RLSSMJSEOOYNOY-UHFFFAOYSA-N  |
| para-cresol                       | 62 | IWDCLRJOBBERNH-UHFFFAOYSA-N  |
| 2-methoxyphenol                   | 63 | LHGVTZTFXWLCU-UHFFFAOYSA-N   |
| 2,4-dimethylphenol                | 64 | KUFFULVDNCHOFZ-UHFFFAOYSA-N  |
| 3-chlorophenol                    | 65 | HORNXRQVQWOLPJ-UHFFFAOYSA-N  |
| diethyl ether                     | 66 | RTZKZFJDLAIYFH-UHFFFAOYSA-N  |
| di-n-propyl ether                 | 67 | POLCUAVZOMRGSN-UHFFFAOYSA-N  |
| diisopropyl ether                 | 68 | ZAFNMIOTHYJRJ-UHFFFAOYSA-N   |
| dibutyl ether                     | 69 | DURPTKYDGMDSBL-UHFFFAOYSA-N  |
| bis(2-chloroethyl) ether          | 70 | ZNSMNVMLTJELDZ-UHFFFAOYSA-N  |
| 1,2-dimethoxyethane               | 71 | XTHFKEDIFGKHM-UHFFFAOYSA-N   |
| diethylene glycol dimethyl ether  | 72 | SBZXBUIDTXKZTM-UHFFFAOYSA-N  |
| furan                             | 73 | YLQBMQCUJZJEEH-UHFFFAOYSA-N  |
| tetrahydrofuran                   | 74 | WYURNTSHIVDZCO-UHFFFAOYSA-N  |
| 2-methyltetrahydrofuran           | 75 | JWUJQDFVADABEY-RXMQYKEDSA-N  |
| tetrahydropyran                   | 76 | DHXVVGJBLRPWPCS-UHFFFAOYSA-N |
| 1,3-dioxane                       | 77 | VDFVNEFVBPFDSE-UHFFFAOYSA-N  |
| 1,3-dioxolan                      | 78 | WNXJIVFYUUVYPPR-UHFFFAOYSA-N |
| 1,8-cineole                       | 79 | WEEGYLXZBRQIMU-WAAGHKOSSA-N  |
| anisole                           | 80 | RDOXTESZEPMUJZ-UHFFFAOYSA-N  |
| ethyl phenyl ether                | 81 | DLRJIUOBPOJNS-UHFFFAOYSA-N   |
| diphenyl ether                    | 82 | USIUUVYZYUHIAEV-UHFFFAOYSA-N |
| dibenzyl ether                    | 83 | MHDVGSVTJDSBDK-UHFFFAOYSA-N  |
| 1,2-dimethoxybenzene              | 84 | ABDKAPXRBAPSQN-UHFFFAOYSA-N  |
| methyl orthoformate               | 85 | PYOKUURKVVLELLB-UHFFFAOYSA-N |

Continued on next page

| Solvent                         | ID  | InChIKey                     |
|---------------------------------|-----|------------------------------|
| methyl orthoacetate             | 86  | HDPNBNXLBDFELL-UHFFFAOYSA-N  |
| propionaldehyde                 | 87  | NBBJYMSMWIIQGU-UHFFFAOYSA-N  |
| butyraldehyde                   | 88  | ZTQSAGDEMFDKMZ-UHFFFAOYSA-N  |
| benzaldehyde                    | 89  | HUMNYLRZRPPJDN-UHFFFAOYSA-N  |
| p-methoxybenzaldehyde           | 90  | ZRSNZINYAWTAHE-UHFFFAOYSA-N  |
| cinnamaldehyde                  | 91  | KJPRLNWUNMBNBZ-QPJXVBHSA-N   |
| acetone                         | 92  | CSCPPACGZOOCGX-UHFFFAOYSA-N  |
| 2-butanone                      | 93  | ZWEHNKRNPPOVVGH-UHFFFAOYSA-N |
| 2-pentanone                     | 94  | XNLICIUVMPYHGG-UHFFFAOYSA-N  |
| 3-methyl-2-butanone             | 95  | SYBYTAAJFKOIEJ-UHFFFAOYSA-N  |
| 3-pentanone                     | 96  | FDPIMTJIUBPUKL-UHFFFAOYSA-N  |
| cyclopentanone                  | 97  | BGTOWKSIORTVQH-UHFFFAOYSA-N  |
| 4-methyl-2-pentanone            | 98  | NTIZESTWPVYFNL-UHFFFAOYSA-N  |
| 3,3-dimethyl-2-butanone         | 99  | PJGSXYOJTGZAV-UHFFFAOYSA-N   |
| perfluorooctane                 | 100 | YVBBRRALBYAZBM-UHFFFAOYSA-N  |
| cyclohexanone                   | 101 | JHIVVAPYMSGYDF-UHFFFAOYSA-N  |
| 2-heptanone                     | 102 | CATSNJVOTSVZJV-UHFFFAOYSA-N  |
| 3-heptanone                     | 103 | NGAZZOYFWWSOGK-UHFFFAOYSA-N  |
| 2,2,4,4-tetramethyl-3-pentanone | 104 | UIQGEWJEWJMQSL-UHFFFAOYSA-N  |
| acetophenone                    | 105 | KWOLFJPFCHCOCG-UHFFFAOYSA-N  |
| ethyl phenyl ketone             | 106 | KRIOVPPHQLHCZ-UHFFFAOYSA-N   |
| benzyl methyl ketone            | 107 | QCCDLTOVEPVEJK-UHFFFAOYSA-N  |
| 2,4,5-trimethylacetophenone     | 108 | GENBEGZNCBFHSU-UHFFFAOYSA-N  |
| p-chloroacetophenone            | 109 | BUZYGTVTZYSBCU-UHFFFAOYSA-N  |
| diphenyl ketone                 | 110 | RWCCWEUUXYIKHB-UHFFFAOYSA-N  |
| 2,4-pentanedione                | 111 | YRKCREAYFQTBPV-UHFFFAOYSA-N  |
| 2,3-butanedione                 | 112 | QSJXEFYPDANLFS-UHFFFAOYSA-N  |
| formic acid                     | 113 | BDAGIHXWWSANSR-UHFFFAOYSA-N  |
| acetic acid                     | 114 | QTBSBXVTEAMEQO-UHFFFAOYSA-N  |
| propanoic acid                  | 115 | XBDQKXXYIPTUBI-UHFFFAOYSA-N  |
| butanoic acid                   | 116 | FERIUCNNQQJTOY-UHFFFAOYSA-N  |
| pentanoic acid                  | 117 | NQPDZGIKBAWPEJ-UHFFFAOYSA-N  |
| hexanoic acid                   | 118 | FUZZWVXGSPDMH-UHFFFAOYSA-N   |
| heptanoic acid                  | 119 | MNWFXYAAYHMED-UHFFFAOYSA-N   |
| dichloroacetic acid             | 120 | JXTHNDFMNIQAHM-UHFFFAOYSA-N  |
| trifluoroacetic acid            | 121 | DTQVDTLACAAQTR-UHFFFAOYSA-N  |
| acetic anhydride                | 122 | WFDIJRYMOXRFFG-UHFFFAOYSA-N  |
| benzoyl chloride                | 123 | PASDCCFISLVPSO-UHFFFAOYSA-N  |
| benzoyl bromide                 | 124 | AQIHMSVIAGNIDM-UHFFFAOYSA-N  |
| methyl formate                  | 125 | TZIHFWKZFHZASV-UHFFFAOYSA-N  |
| ethyl formate                   | 126 | WBJINCZRORDGAQ-UHFFFAOYSA-N  |
| methyl acetate                  | 127 | KXKVLQRXCPHEJC-UHFFFAOYSA-N  |
| ethyl acetate                   | 128 | XEKOWRVHYACXOJ-UHFFFAOYSA-N  |
| n-propyl acetate                | 129 | YKYONYBAUNKHLG-UHFFFAOYSA-N  |
| butyl acetate                   | 130 | DKPFZGUDAPQIHT-UHFFFAOYSA-N  |
| isopentyl acetate               | 131 | MLFHJEHSLIIPHL-UHFFFAOYSA-N  |
| methyl propionate               | 132 | RJUFJBKOKNCXHH-UHFFFAOYSA-N  |
| ethyl propionate                | 133 | FKRCODPIKNYEAC-UHFFFAOYSA-N  |
| dimethyl carbonate              | 134 | IEJIGPNLZYLLBP-UHFFFAOYSA-N  |
| diethyl carbonate               | 135 | OIFBSDVPJOWBCH-UHFFFAOYSA-N  |
| ethylene carbonate              | 136 | KMTRUDSVKNLOMY-UHFFFAOYSA-N  |
| 4-methyl-1,3-dioxolan-2-one     | 137 | RUOJZAUFBMNUDX-GSVOUGTGSA-N  |
| diethyl malonate                | 138 | IYXGSMUGOJNHAZ-UHFFFAOYSA-N  |
| methyl benzoate                 | 139 | QPJVMBTYPHYUOC-UHFFFAOYSA-N  |
| ethyl benzoate                  | 140 | MTZQAGJQAFMTAQ-UHFFFAOYSA-N  |
| dimethylphthalate               | 141 | NIQCNGHVCWTJSM-UHFFFAOYSA-N  |
| di-n-butylorthophthalate        | 142 | DOIRQSBPFJWKBE-UHFFFAOYSA-N  |
| ethyl chloroacetate             | 143 | VEUUMBGHMNQHGO-UHFFFAOYSA-N  |
| ethyl trichloroacetate          | 144 | SJMLNDPIJZBEKY-UHFFFAOYSA-N  |
| ethyl acetoacetate              | 145 | XYIBRDXRRQCHLP-UHFFFAOYSA-N  |
| gamma-butyrolactone             | 146 | YEJRWHAVMIAJKC-UHFFFAOYSA-N  |
| n-perfluorohexane               | 147 | ZJIJAJXFLBMLCK-UHFFFAOYSA-N  |
| perfluoromethylcyclohexane      | 148 | QIROQPWSJUXOJC-UHFFFAOYSA-N  |

Continued on next page

| Solvent                    | ID  | InChIKey                     |
|----------------------------|-----|------------------------------|
| perfluoroheptane           | 149 | LGUZHRODIJCVOC-UHFFFAOYSA-N  |
| cis-perfluorodecalin       | 150 | UWEYRJJFJVCLAGH-XIXRPRMCSA-N |
| fluorobenzene              | 151 | PYLWMHQQBFSUBP-UHFFFAOYSA-N  |
| hexafluorobenzene          | 152 | ZQBFAOFFOQMSGJ-UHFFFAOYSA-N  |
| 1,4-dichlorobutane         | 153 | KJDRSWPQXHESDQ-UHFFFAOYSA-N  |
| chlorobenzene              | 154 | MVPPADPHJFYWMZ-UHFFFAOYSA-N  |
| dichloromethane            | 155 | YMWUJEATGCHHMB-UHFFFAOYSA-N  |
| 1,1-dichloroethane         | 156 | SCYULBFZEHDVBN-UHFFFAOYSA-N  |
| 1,2-dichloroethane         | 157 | WSLDOOZREJYCGB-UHFFFAOYSA-N  |
| trans-1,2-dichloroethylene | 158 | KFUSEUYWQURPO-OWOJBTEDSA-N   |
| ortho-dichlorobenzene      | 159 | RFFLAFLAYFXFSW-UHFFFAOYSA-N  |
| meta-dichlorobenzene       | 160 | ZPQQPVIELGIULI-UHFFFAOYSA-N  |
| chloroform                 | 161 | HEDRZPFGACZZDS-UHFFFAOYSA-N  |
| 1,1,1-trichloroethane      | 162 | UOCLXMDMGBRAIB-UHFFFAOYSA-N  |
| 1,1,2-trichloroethane      | 163 | UBOXGVDOUJQMTN-UHFFFAOYSA-N  |
| trichloroethylene          | 164 | XSTXAVWGXDKEL-UHFFFAOYSA-N   |
| 1,2,4-trichlorobenzene     | 165 | PBKONEOXTCPAFI-UHFFFAOYSA-N  |
| carbon tetrachloride       | 166 | VZGDMQKNWNREIO-UHFFFAOYSA-N  |
| tetrachloroethylene        | 167 | CYTYCFOTNPOANT-UHFFFAOYSA-N  |
| 1,1,2,2-tetrachloroethane  | 168 | QPFMBZIOSGYJDE-UHFFFAOYSA-N  |
| pentachloroethane          | 169 | BNIXVQGCZULYKV-UHFFFAOYSA-N  |
| 1-bromobutane              | 170 | MPPPKRYCTPRNTB-UHFFFAOYSA-N  |
| bromobenzene               | 171 | QARVLSVVCXYDNA-UHFFFAOYSA-N  |
| dibromomethane             | 172 | FJBFPHVGVWTDIP-UHFFFAOYSA-N  |
| 1,2-dibromoethane          | 173 | PAAZPARNPHGIKF-UHFFFAOYSA-N  |
| bromoform                  | 174 | DIKBFYAXUHHXCS-UHFFFAOYSA-N  |
| n-butyl iodide             | 175 | KMGBZBJJOKUPIA-UHFFFAOYSA-N  |
| iodobenzene                | 176 | SNHMUERNLJLMHN-UHFFFAOYSA-N  |
| methylene iodide           | 177 | NZZFYRREKKOMAT-UHFFFAOYSA-N  |
| n-butylamine               | 178 | HQABUPZFAYXKJW-UHFFFAOYSA-N  |
| benzylamine                | 179 | WGQKYBSKWIADBV-UHFFFAOYSA-N  |
| ethylenediamine            | 180 | PIICEJLVQHRZGT-UHFFFAOYSA-N  |
| diethylamine               | 181 | HPNMFZURQLUMO-UHFFFAOYSA-N   |
| di-n-butylamine            | 182 | JQVDAXLFBXTEQA-UHFFFAOYSA-N  |
| pyrrole                    | 183 | KAESVJOAVNADME-UHFFFAOYSA-N  |
| pyrrolidine                | 184 | RWRDLPLDKQPQOW-UHFFFAOYSA-N  |
| piperidine                 | 185 | NQRYJNQNLNOLGT-UHFFFAOYSA-N  |
| morpholine                 | 186 | YNAVUWVOSKDBBP-UHFFFAOYSA-N  |
| triethylamine              | 187 | ZMANZCXQSJIPKH-UHFFFAOYSA-N  |
| tri-(n-butyl)amine         | 188 | IMFACGCPASFAPR-UHFFFAOYSA-N  |
| aniline                    | 189 | PAYRUJLWNCNPSJ-UHFFFAOYSA-N  |
| o-chloroaniline            | 190 | AKCRQHGQJBRMN-UHFFFAOYSA-N   |
| methylphenylamine          | 191 | AFBPFWSMIHQDM-UHFFFAOYSA-N   |
| N,N-dimethylaniline        | 192 | JLTDJTHDQAWBAV-UHFFFAOYSA-N  |
| aminoethanol               | 193 | HZAXFHJVJLSVMW-UHFFFAOYSA-N  |
| diethanolamine             | 194 | ZBCBWPMODOFKDW-UHFFFAOYSA-N  |
| triethanolamine            | 195 | GSEJCLTVZPLZKY-UHFFFAOYSA-N  |
| pyridine                   | 196 | JUJWROIIHBZHMJ-UHFFFAOYSA-N  |
| 2-methylpyridine           | 197 | BSKHPKMHTQYZBB-UHFFFAOYSA-N  |
| 3-methylpyridine           | 198 | ITQTTZVARXURQS-UHFFFAOYSA-N  |
| 4-methylpyridine           | 199 | FKNQCJSGGFJEIZ-UHFFFAOYSA-N  |
| 2,4-dimethylpyridine       | 200 | JYYNAJVZFGKDEQ-UHFFFAOYSA-N  |
| 2,6-dimethylpyridine       | 201 | OISVCGZHLKNMSJ-UHFFFAOYSA-N  |
| 2,4,6-trimethylpyridine    | 202 | BWZVCCNYKMEVEX-UHFFFAOYSA-N  |
| 2-bromopyridine            | 203 | IMRWILPUOYGIMU-UHFFFAOYSA-N  |
| 3-bromopyridine            | 204 | NYPYPOZNGOXSU-UHFFFAOYSA-N   |
| 2-cyanopyridine            | 205 | FFNVQNRYPFDDP-UHFFFAOYSA-N   |
| pyrimidine                 | 206 | CZPWVGJYEJSLRH-UHFFFAOYSA-N  |
| quinoline                  | 207 | SMWDFEZZVXVCRB-UHFFFAOYSA-N  |
| acetonitrile               | 208 | WEVYAHXRMPXWCK-UHFFFAOYSA-N  |
| propionitrile              | 209 | FVSKHRXBFJPNKK-UHFFFAOYSA-N  |
| n-butyronitrile            | 210 | KVNRLNFWIYMESJ-UHFFFAOYSA-N  |
| 3-methylbutanenitrile      | 211 | QHDKRFYEGYYIHK-UHFFFAOYSA-N  |

Continued on next page

| Solvent                       | ID  | InChIKey                     |
|-------------------------------|-----|------------------------------|
| acrylonitrile                 | 212 | NLHHRLWOUZZQLW-UHFFFAOYSA-N  |
| phenylacetone                 | 213 | SUSQOBVLVYHIEX-UHFFFAOYSA-N  |
| benzotrile                    | 214 | JFDZBHWFFUWGJE-UHFFFAOYSA-N  |
| nitromethane                  | 215 | LYGJENNIWJXYER-UHFFFAOYSA-N  |
| nitroethane                   | 216 | MCSAJNNLRCFZED-UHFFFAOYSA-N  |
| 1-nitropropane                | 217 | JSZOAYXJRCEYSX-UHFFFAOYSA-N  |
| 2-nitropropane                | 218 | FGLBSLMDCBOPQK-UHFFFAOYSA-N  |
| nitrobenzene                  | 219 | LQNUZADURLCDLV-UHFFFAOYSA-N  |
| formamide                     | 220 | ZHNUHDYFZUAESO-UHFFFAOYSA-N  |
| N-methylformamide             | 221 | ATHHXGZTWNVVOU-UHFFFAOYSA-N  |
| N,N-dimethylformamide         | 222 | ZMXDDKWLCZADIW-UHFFFAOYSA-N  |
| N,N-dimethylthioformamide     | 223 | SKECXRFZFFAANN-UHFFFAOYSA-N  |
| N,N-diethylformamide          | 224 | SUAKHGWARZSWIH-UHFFFAOYSA-N  |
| N-methylacetamide             | 225 | OHLUHNLEMFGTQ-UHFFFAOYSA-N   |
| N,N-dimethylacetamide         | 226 | FXHOOIRPVKKKFG-UHFFFAOYSA-N  |
| N,N-diethylacetamide          | 227 | AJFDBNQDYLMJN-UHFFFAOYSA-N   |
| 2-pyrrolidinone               | 228 | HNJBEVLQSNELDL-UHFFFAOYSA-N  |
| N-methyl pyrrolidinone        | 229 | SEXXISVLQFMRJM-UHFFFAOYSA-N  |
| 1-methyl-2-pyrrolidinethione  | 230 | OQILOJRSIWGQSM-UHFFFAOYSA-N  |
| tetramethylurea               | 231 | AVQQQNCBBIEMEU-UHFFFAOYSA-N  |
| tetraethylurea                | 232 | UWHSPZUAYSGTB-UHFFFAOYSA-N   |
| dimethylcyanamide             | 233 | OAGOUJGJXNLLJNL-UHFFFAOYSA-N |
| carbon disulfide              | 234 | QGGJOPFRUJISHPQ-UHFFFAOYSA-N |
| dimethyl sulfide              | 235 | QMMFVYPAHWMCMS-UHFFFAOYSA-N  |
| diethyl sulfide               | 236 | LJSQFQKUNVCTIA-UHFFFAOYSA-N  |
| diisopropyl sulfide           | 237 | XYWDPYKBIRXQS-UHFFFAOYSA-N   |
| dibutyl sulfide               | 238 | HTIRHQRDDBPHNZ-UHFFFAOYSA-N  |
| tetrahydrothiophene           | 239 | RAOIDOHSFRTOEL-UHFFFAOYSA-N  |
| thiane                        | 240 | YPWFISCTZQNZAU-UHFFFAOYSA-N  |
| dimethylsulfoxide             | 241 | IAZDPXIOMUYVGZ-UHFFFAOYSA-N  |
| dibutyl sulfoxide             | 242 | LOWMYOWHQMKBTM-UHFFFAOYSA-N  |
| sulfolane                     | 243 | HXJUTPCZVOIRIF-UHFFFAOYSA-N  |
| thiobis(2-ethanol)            | 244 | YODZTKMDCQEPHD-UHFFFAOYSA-N  |
| diethyl sulfite               | 245 | NVJBFARDFTXOTO-UHFFFAOYSA-N  |
| dimethyl sulfate              | 246 | VAYGXNSJCAHWJZ-UHFFFAOYSA-N  |
| diethyl sulfate               | 247 | DENRZWYUOJLTMF-UHFFFAOYSA-N  |
| methanesulfonic acid          | 248 | AFVFAQIVMOAPDHO-UHFFFAOYSA-N |
| trimethylphosphate            | 249 | WVLBCYQITXONBZ-UHFFFAOYSA-N  |
| triethylphosphate             | 250 | DQWPFSLDHJDLRL-UHFFFAOYSA-N  |
| tri-n-butylphosphate          | 251 | STCOOQWBFONSKY-UHFFFAOYSA-N  |
| hexamethylphosphoric triamide | 252 | GNOIPBMMFNIUFM-UHFFFAOYSA-N  |
| hydrogen peroxide             | 253 | MHAJPDJPQMAIY-UHFFFAOYSA-N   |
| hydrogen fluoride             | 254 | KRHYYFGTRYWZRS-UHFFFAOYSA-N  |
| sulfuric acid                 | 255 | QAOWNCQODCNURD-UHFFFAOYSA-N  |
| ammonia                       | 256 | QGZKDVFNNGYKY-UHFFFAOYSA-N   |
| hydrazine                     | 257 | OAKJQQAXSVQMHS-UHFFFAOYSA-N  |
| sulfur dioxide                | 258 | RAHZWNYVWXNFOC-UHFFFAOYSA-N  |
| thionyl chloride              | 259 | FYSNRJHAOHDILO-UHFFFAOYSA-N  |
| phosphorus oxychloride        | 260 | XHXFXVLFKHQFAL-UHFFFAOYSA-N  |
| dihydrolevoglucosenone        | 261 | WHIRALQRTSITMI-UJURSFKZSA-N  |

Table S2: Solvent information.

### S3 Similarity regional dendrograms

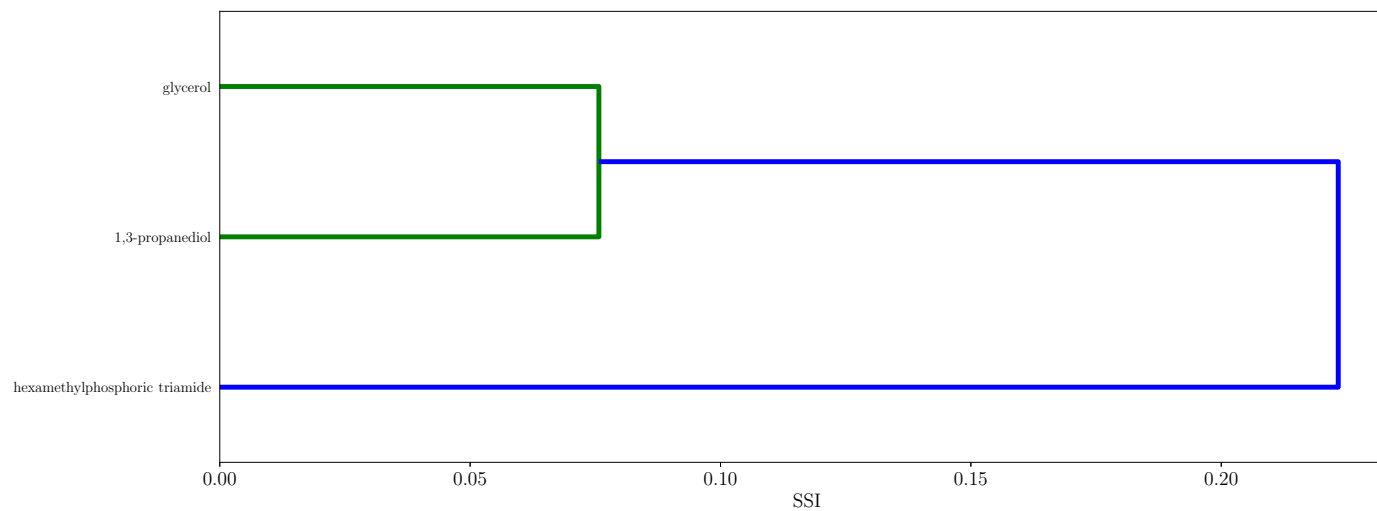

Figure S1: Dendrogram for solvents to the left of node 1 in Figure 2.

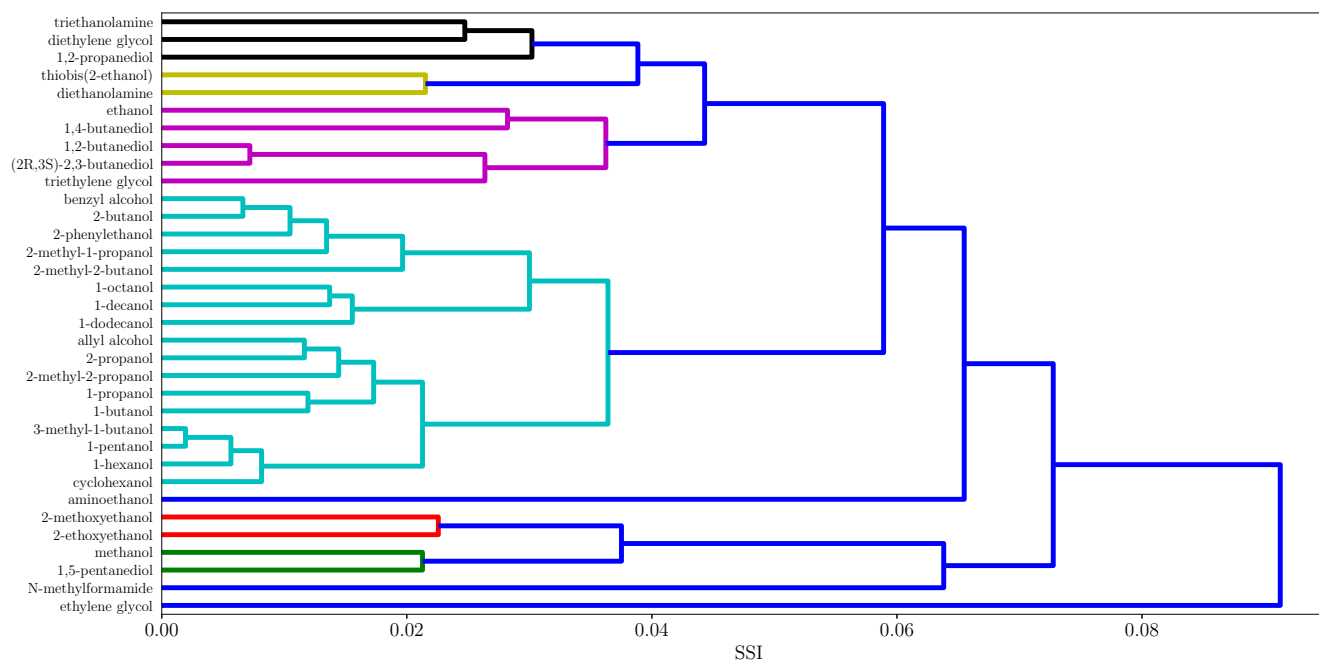

Figure S2: Dendrogram for solvents to the left of node 2 in Figure 2.

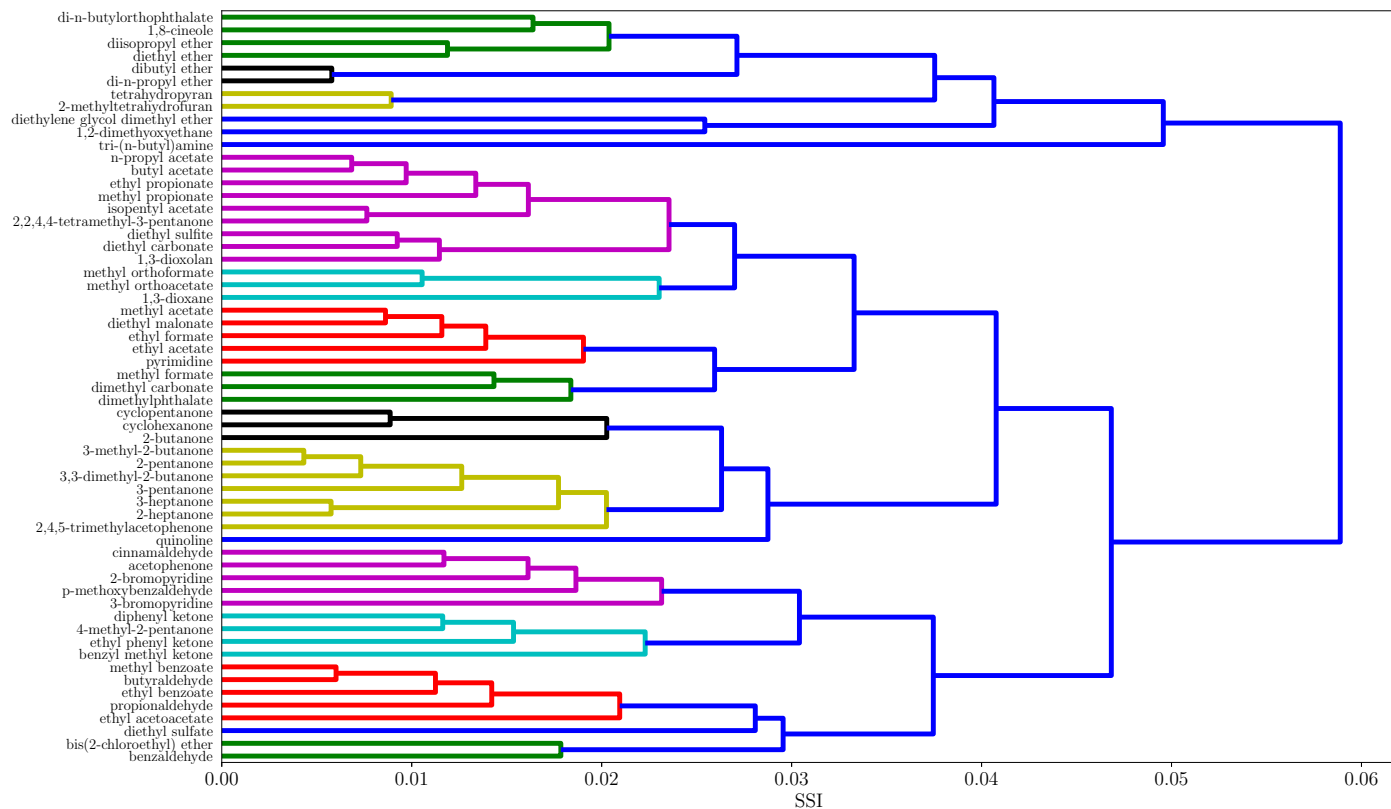

Figure S3: Dendrogram for solvents to the left of node 3 in Figure 2.



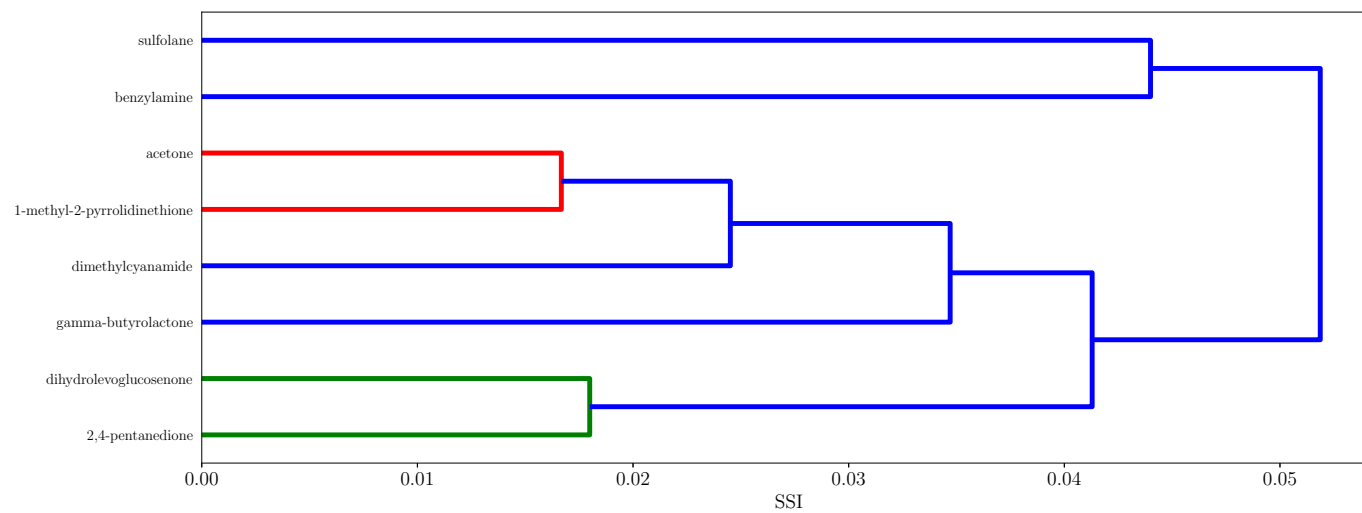

Figure S4: Dendrogram for solvents to the left of node 4 in Figure 2.

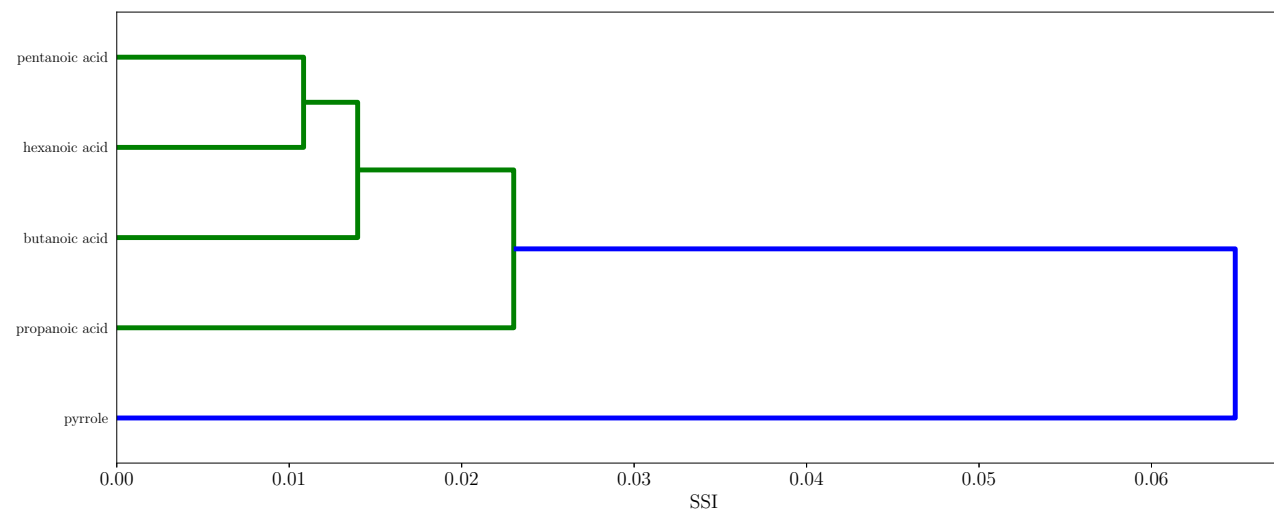

Figure S5: Dendrogram for solvents to the left of node 5 in Figure 2.

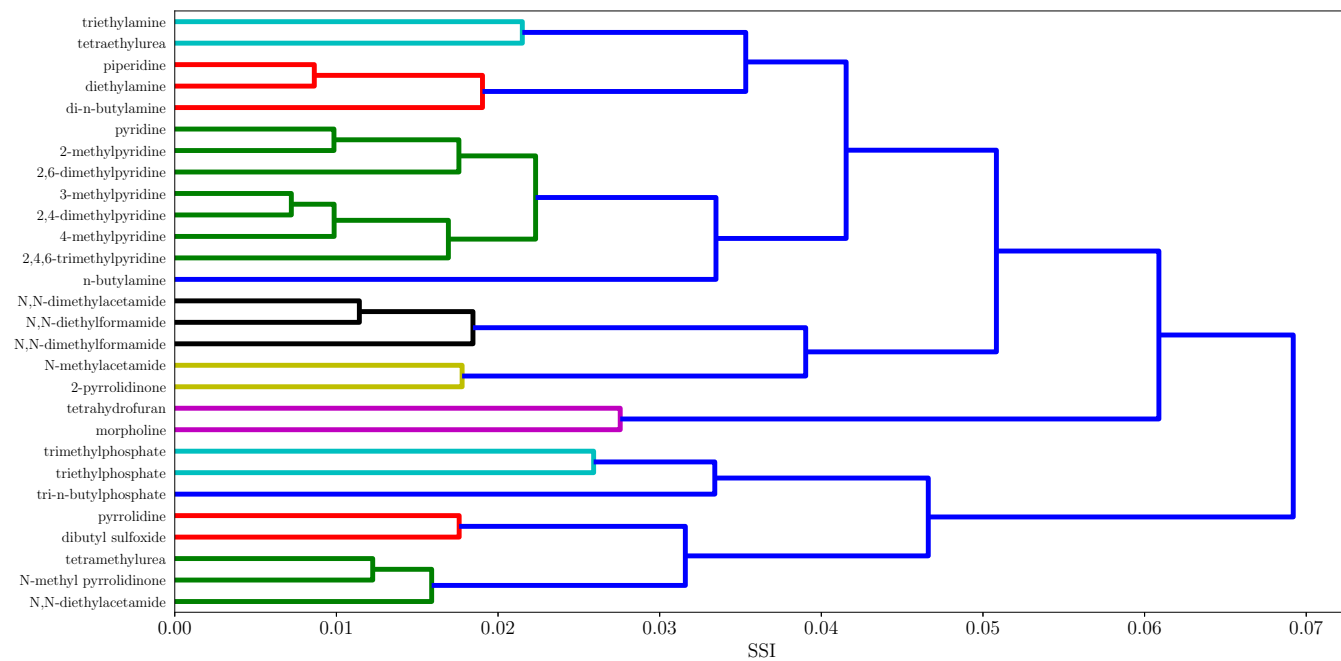

Figure S6: Dendrogram for solvents to the left of node 6 in Figure 2.

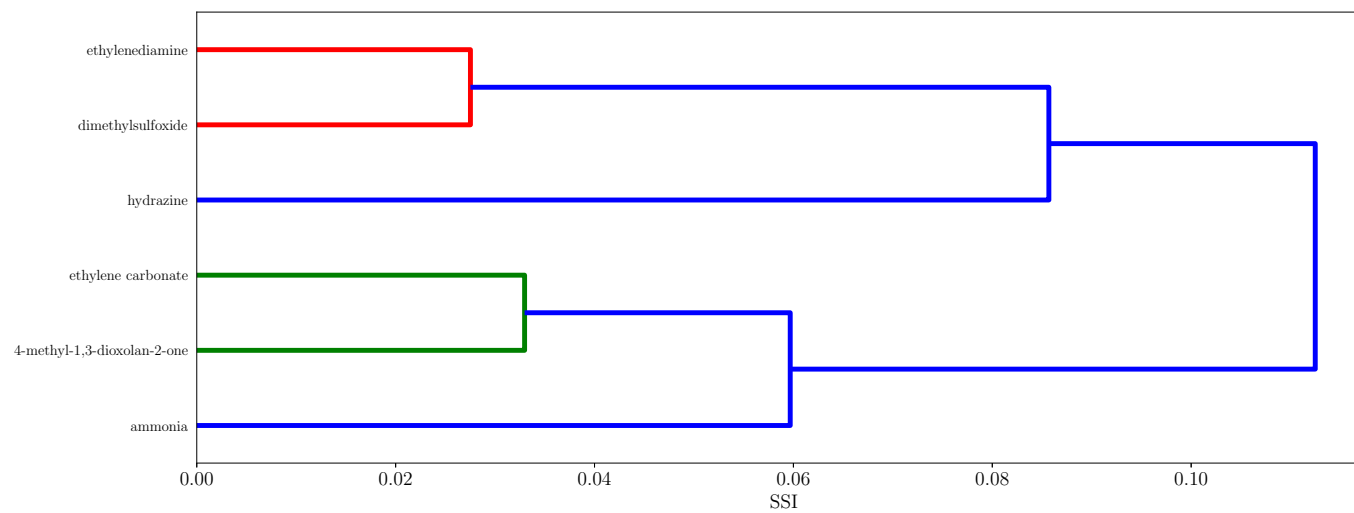

Figure S7: Dendrogram for solvents to the left of node 7 in Figure 2.

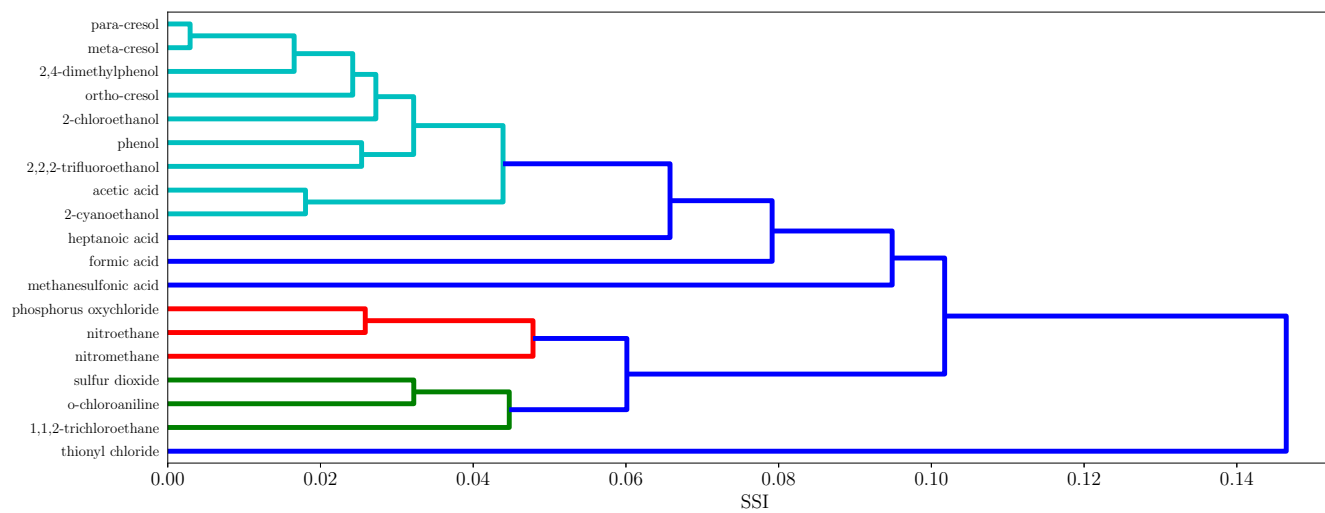

Figure S8: Dendrogram for solvents to the left of node 8 in Figure 2.

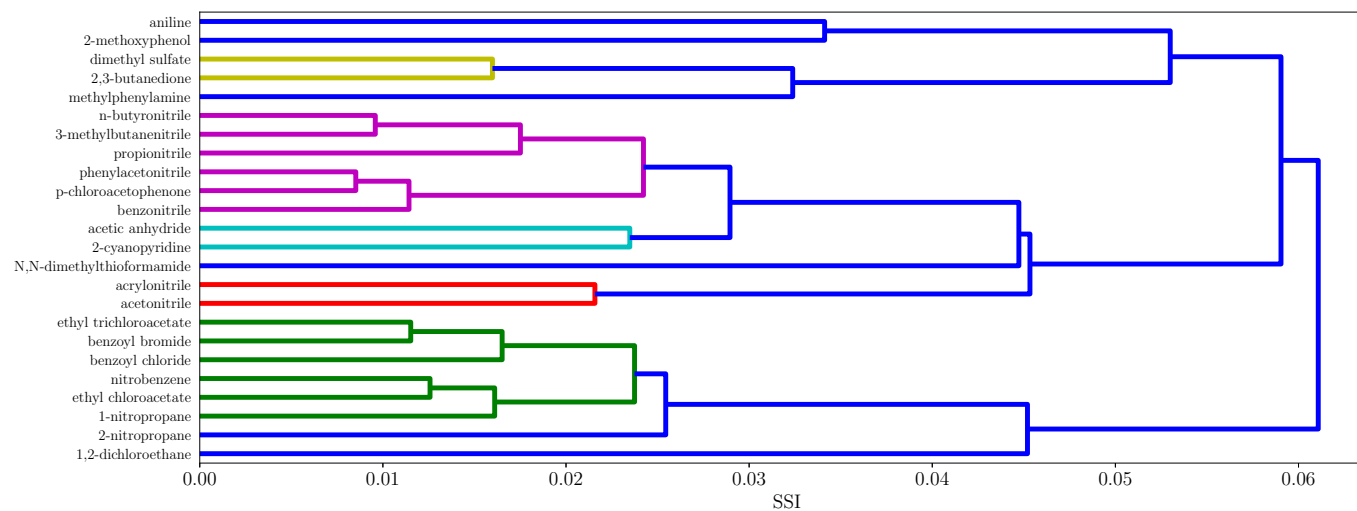

Figure S9: Dendrogram for solvents to the left of node 9 in Figure 2.

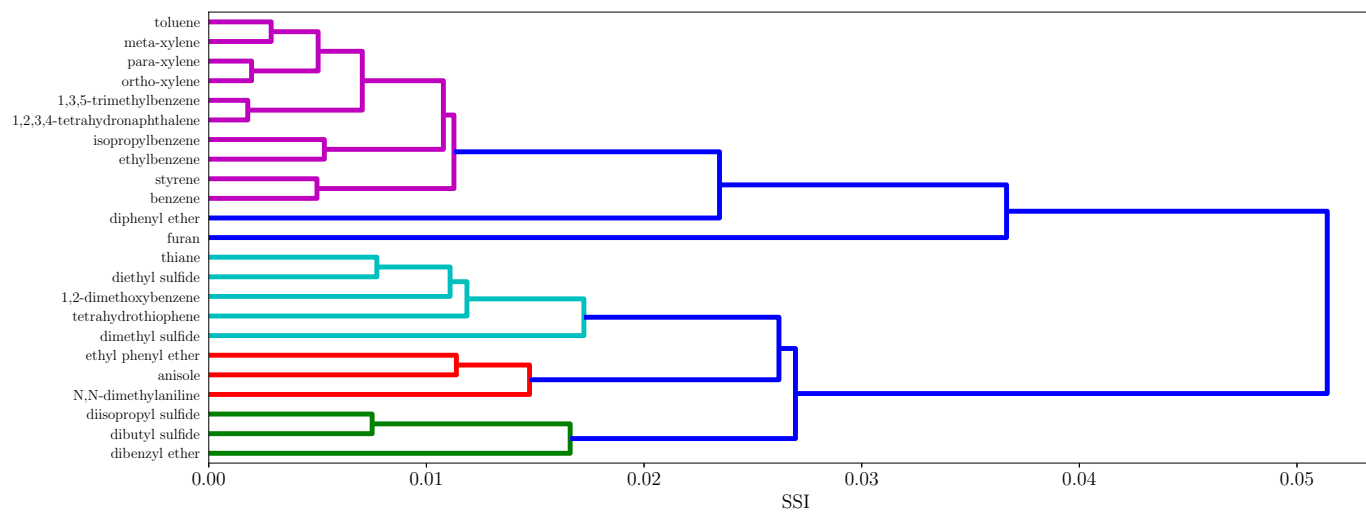

Figure S10: Dendrogram for solvents to the left of node 10 in Figure 2.

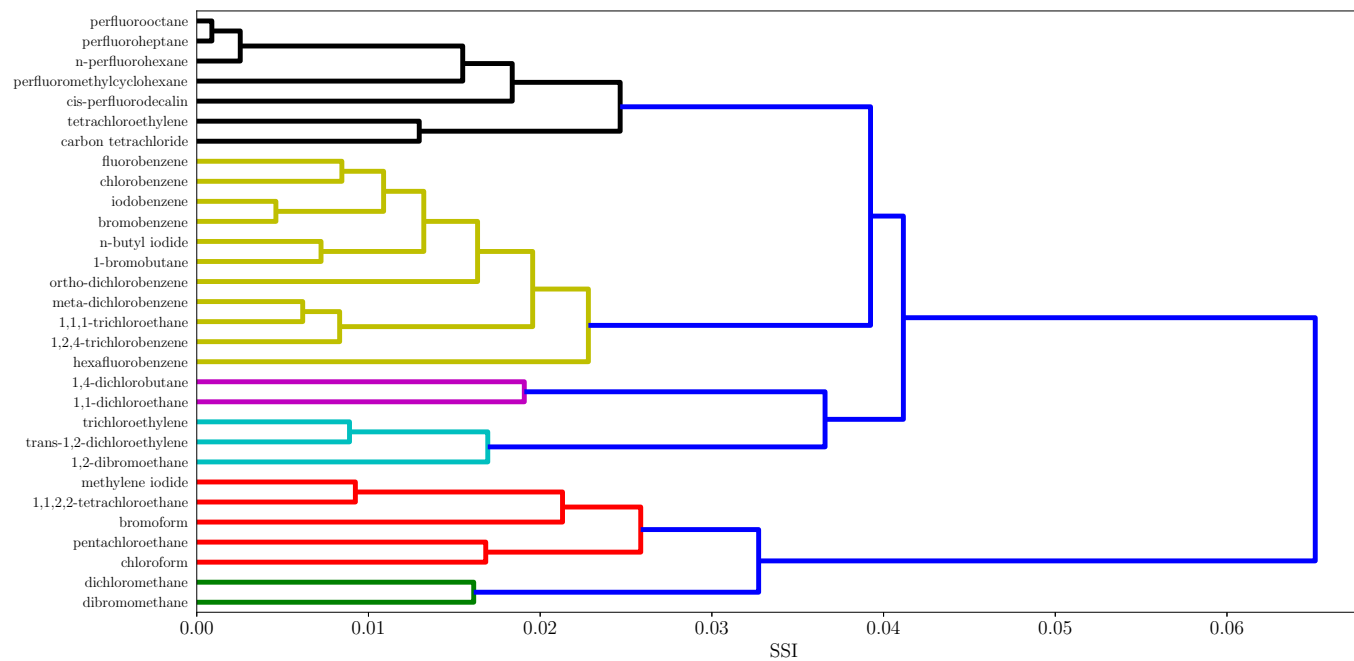

Figure S11: Dendrogram for solvents to the left of node 11 in Figure 2.



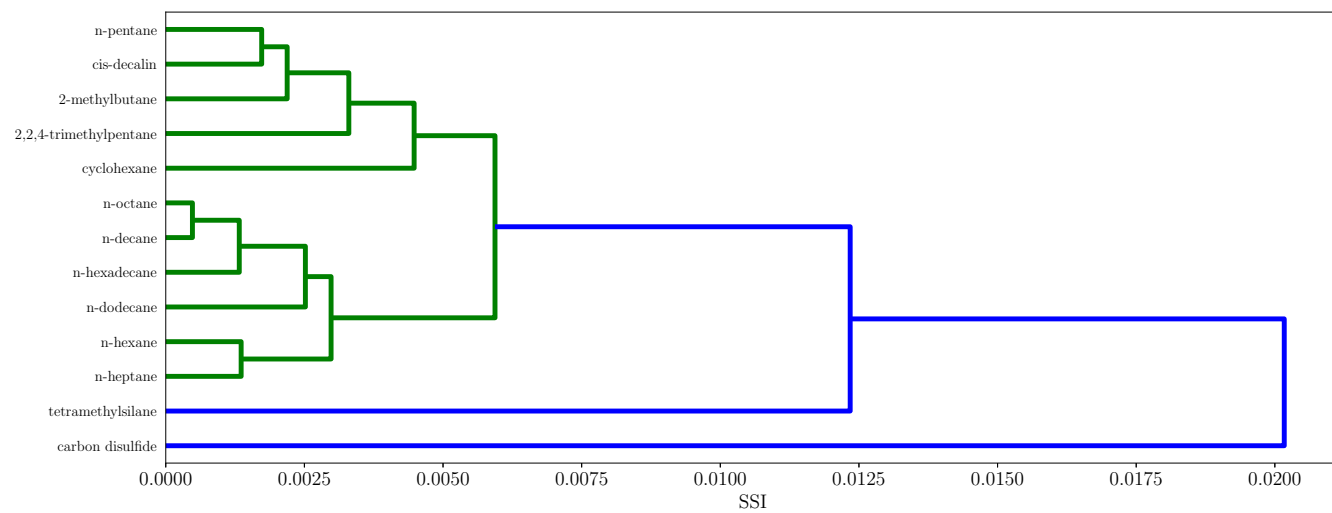

Figure S12: Dendrogram for solvents to the left of node 12 in Figure 2.

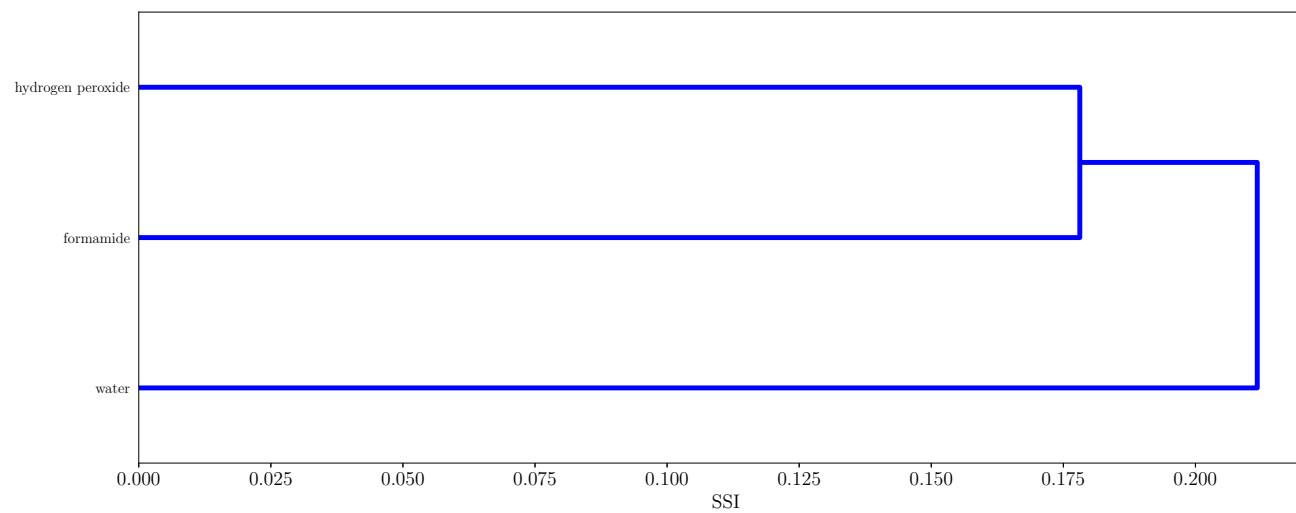

Figure S13: Dendrogram for solvents to the left of node 13 in Figure 2.

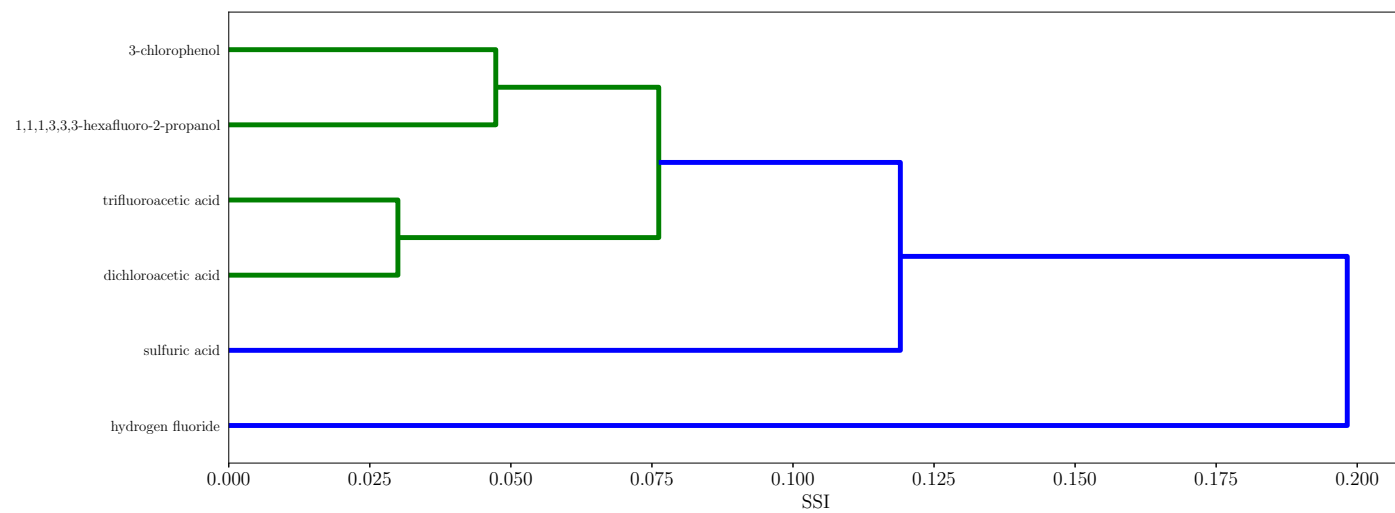

Figure S14: Dendrogram for solvents to the left of node 14 in Figure 2.
